# Supplementary material
Source: PubMed Central journal article supplement (PMC2536730)

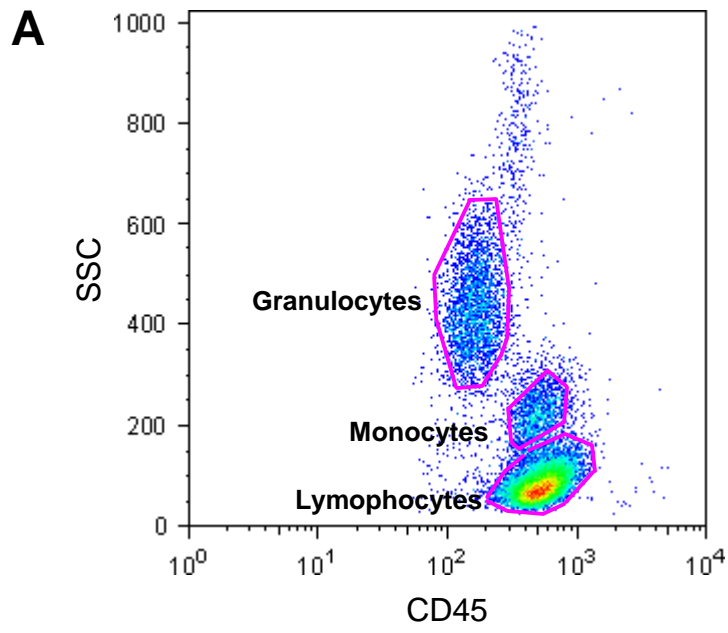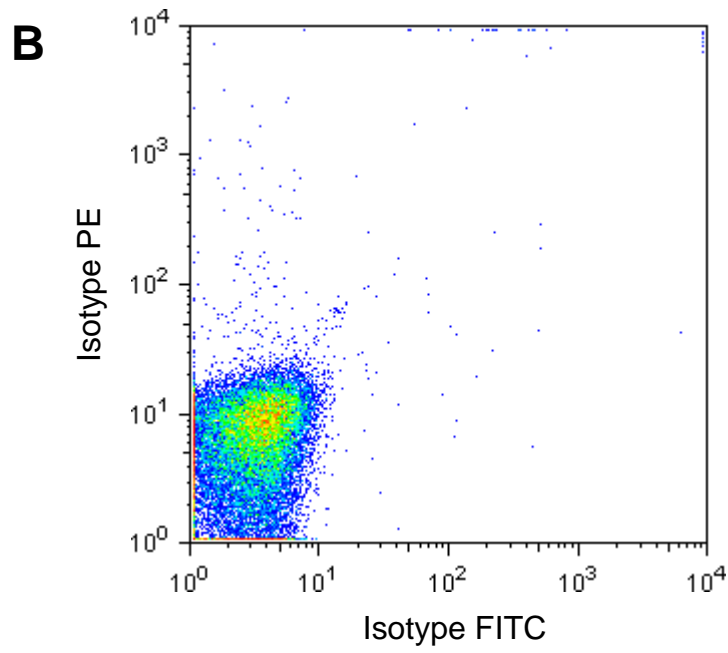

Supplement: 90384.2008_1.pdf [file 90384.2008_1.pdf]

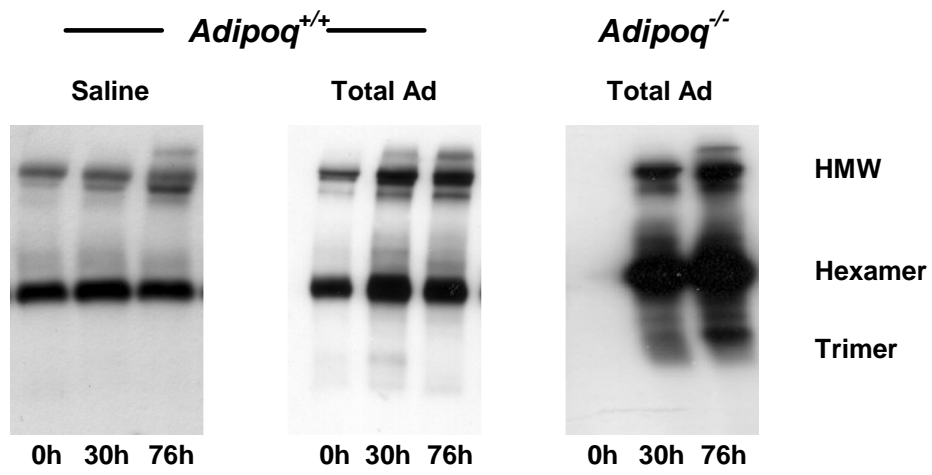

Supplement: 90384.2008_2.pdf [file 90384.2008_2.pdf]
